# Supplementary material for: Direct Gαq Gating Is the Sole Mechanism for TRPM8 Inhibition Caused by Bradykinin Receptor Activation
Source: PubMed Central journal article supplement (PMC6595177; doi:10.1016/j.celrep.2019.05.080), 2019-06-18
Supplement: mmc1.pdf [file mmc1.pdf]

Cell Reports, Volume 27

## Supplemental Information

**Direct  $G_{\alpha_q}$  Gating Is the Sole Mechanism  
for TRPM8 Inhibition Caused  
by Bradykinin Receptor Activation**

Xuming Zhang

## Supplemental Information

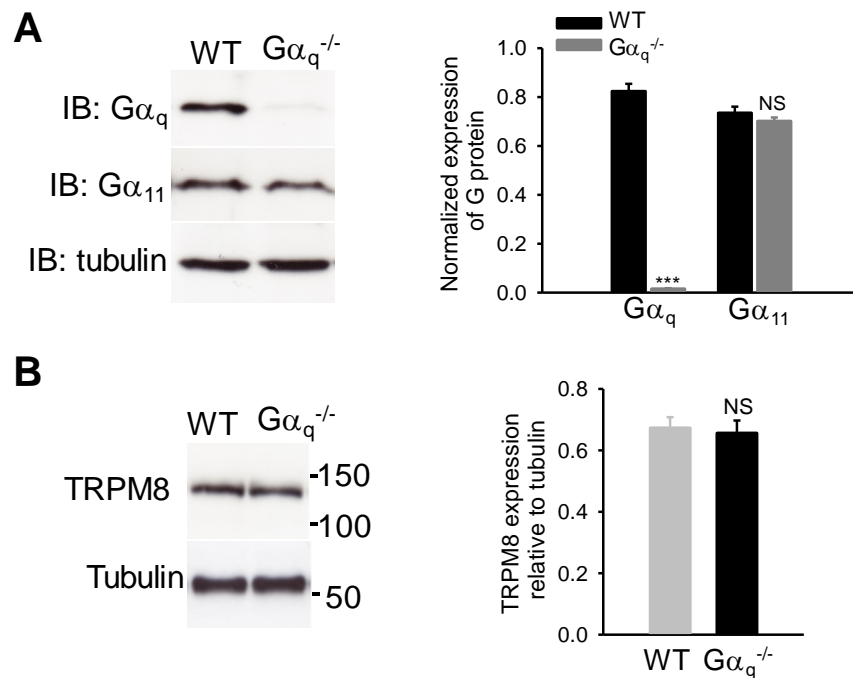

**Figure S1.  $G\alpha_q$  is Deleted in DRG neurons from  $G\alpha_q^{-/-}$  Mice (related to Figure 1).**

(A) Expression of  $G\alpha_q$  and  $G\alpha_{11}$  in DRG neurons from wild-type (WT) and  $G\alpha_q^{-/-}$  mice. On the right is the summary of expression of  $G\alpha_q$  and  $G\alpha_{11}$  relative to tubulin from experiments similar to those on the left. \*\*\*  $P < 0.001$ ; NS, not significant ( $n=3$ ). (B) Example of TRPM8 expression in DRG neurons from WT and  $G\alpha_q^{-/-}$  mice. On the right is the quantification of TRPM8 expression relative to that of  $\beta$ -tubulin from experiments similar to those on the left. NS, not significant ( $n=3$ ).

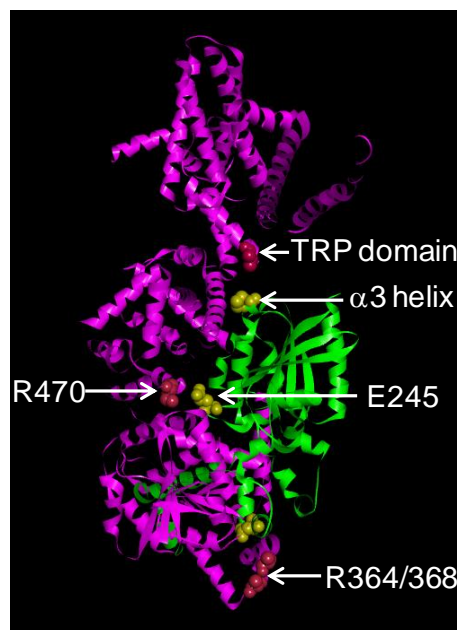

**Figure S2. Ribbon Representation of Modelling Interactions between TRPM8 and  $G\alpha_q$  (related to Figure 5).** The top TRP domain (V992), lateral R470 and bottom R364/R368 lining the cytoplasmic cavity of TRPM8 are in close proximity to  $\alpha 3$  helix (P262), the Switch III domain (E245) and the helical domain in  $G\alpha_q$  (D138),

respectively. Potential interacting residues (R470-E245, R364/368-D138) between these domains are shown as balls.

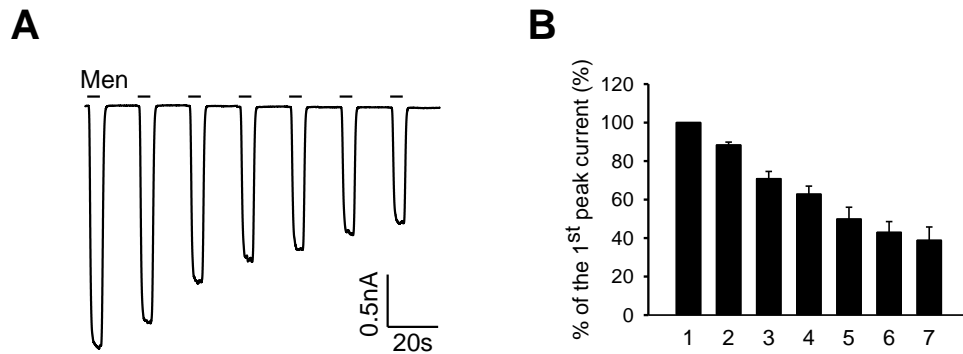

**Figure S3. Run-down of TRPM8 Currents (related to Figure 6).** (A) Example current traces in HEK293 cells expressing TRPM8 elicited by a series of menthol (200 $\mu$ M, 5s) in Ca<sup>2+</sup>-free solution. (B) Summary of percentage of TRPM8 currents relative to the 1<sup>st</sup> peak current (n=5).

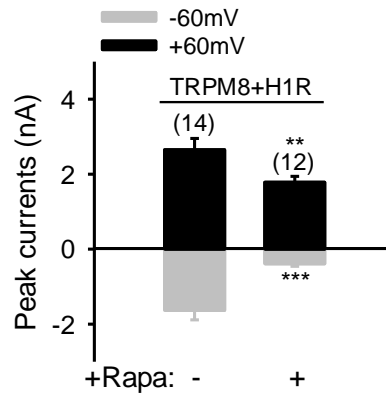

**Figure S4. PIP<sub>2</sub> Depletion Inhibits TRPM8 in the Presence of H1R (related to Figure 7).** Bar summary of peak inward and outward currents (-60mV and +60mV holding, respectively) of TRPM8 co-expressed with the inducible PIP<sub>2</sub> depletion system and H1R from experiments similar to those in Figure 7C. Depletion of PIP<sub>2</sub> by adding rapamycin (+) (Rapa, 1 $\mu$ M, 1min) inhibited TRPM8 currents. The number of experiments is shown above each bar. \*\* $P < 0.01$ ; \*\*\* $P < 0.001$ .
